# Supplementary material for: Association between the quality of plant‐based diets and risk of frailty
Source: PubMed Central journal article supplement (PMC9745455; doi:10.1002/jcsm.13077), 2022-09-30

**Supplementary table 1. Food items and criteria for scoring each plant-based diet indices (from the 1990 NHS food frequency questionnaire).**

|                                 |                                                                                                                                                                                                                                                                                                                                                                                                                                                                             | hPDI            | uPDI           |
|---------------------------------|-----------------------------------------------------------------------------------------------------------------------------------------------------------------------------------------------------------------------------------------------------------------------------------------------------------------------------------------------------------------------------------------------------------------------------------------------------------------------------|-----------------|----------------|
| <i>Healthy plant foods</i>      |                                                                                                                                                                                                                                                                                                                                                                                                                                                                             |                 |                |
| Whole grains                    | Whole grain breakfast cereal, other cooked breakfast cereal, cooked oatmeal, dark bread, brown rice, other grains, bran, wheat germ, popcorn                                                                                                                                                                                                                                                                                                                                | Positive scores | Reverse scores |
| Fruits                          | Raisins or grapes, prunes, bananas, cantaloupe, watermelon, avocado, fresh apples, applesauce, fresh pears, canned pears, oranges, grapefruit, strawberries, blueberries, peaches or apricots or plums, canned peaches or apricots, other canned fruit                                                                                                                                                                                                                      | Positive scores | Reverse scores |
| Vegetables                      | Tomatoes, tomato juice, tomato sauce, red chili sauce, broccoli, cauliflower, cooked cabbage, coleslaw or uncooked cabbage, Brussels sprouts, raw carrots, cooked carrots, mixed vegetables, yams or sweet potatoes, yellow or winter squash, eggplant or zucchini or other summer squash, kale or mustard or chard greens, cooked spinach, raw spinach, iceberg or head lettuce, romaine or leaf lettuce, green pepper, cucumber, celery, mushrooms, alfalfa sprouts, corn | Positive scores | Reverse scores |
| Nuts                            | Nuts, peanut butter                                                                                                                                                                                                                                                                                                                                                                                                                                                         | Positive scores | Reverse scores |
| Legumes                         | String beans, tofu or soybeans, beans or lentils, peas or lima beans                                                                                                                                                                                                                                                                                                                                                                                                        | Positive scores | Reverse scores |
| Vegetable oil                   | Vegetable oil, oil-based salad dressing                                                                                                                                                                                                                                                                                                                                                                                                                                     | Positive scores | Reverse scores |
| Tea and coffee                  | Tea, coffee, decaffeinated coffee or non-caffeinated tea                                                                                                                                                                                                                                                                                                                                                                                                                    | Positive scores | Reverse scores |
| <i>Less healthy plant foods</i> |                                                                                                                                                                                                                                                                                                                                                                                                                                                                             |                 |                |

|                                        |                                                                                                                                                                                                                                                                        |                |                 |
|----------------------------------------|------------------------------------------------------------------------------------------------------------------------------------------------------------------------------------------------------------------------------------------------------------------------|----------------|-----------------|
| Refined grains                         | Refined grain breakfast cereal, white bread, English muffins or bagels or rolls, muffins or biscuits, white rice, pancakes or waffles, crackers, pasta                                                                                                                 | Reverse scores | Positive scores |
| Potatoes                               | French fries, baked or boiled or mashed potatoes, potato or corn chips                                                                                                                                                                                                 | Reverse scores | Positive scores |
| Sugar-sweetened beverages              | Soda with sugar, noncarbonated fruit drinks with sugar                                                                                                                                                                                                                 | Reverse scores | Positive scores |
| Fruit juices                           | Apple cider (nonalcoholic) or juice, orange juice, grapefruit juice, other fruit juice                                                                                                                                                                                 | Reverse scores | Positive scores |
| Sweets and desserts                    | Chocolates, candy bars, candy without chocolate, cookies (home-baked and ready-made), brownies, doughnuts, cake (home-made and ready-made), sweet roll or coffee cake or other pastry, pie (home-baked and ready-made), jams or jellies or preserves or syrup or honey | Reverse scores | Positive scores |
| <hr/> <b><i>Animal foods</i></b> <hr/> |                                                                                                                                                                                                                                                                        |                |                 |
| Animal fat                             | Butter added to food, butter or lard used for cooking                                                                                                                                                                                                                  | Reverse scores | Reverse scores  |
| Dairy                                  | Skim low fat milk, whole milk, cream, sour cream, sherbet, ice cream, yogurt, cottage or ricotta cheese, cream cheese, other cheese                                                                                                                                    | Reverse scores | Reverse scores  |
| Eggs                                   | Eggs                                                                                                                                                                                                                                                                   | Reverse scores | Reverse scores  |
| Fish and seafood                       | Canned tuna, dark meat fish, other fish, shrimp or lobster or scallops                                                                                                                                                                                                 | Reverse scores | Reverse scores  |
| Meat                                   | Chicken or turkey with skin, chicken or turkey without skin, bacon, hot dogs, processed meats, hamburger, liver, beef or pork or lamb as a mixed dish, beef or pork or lamb as a main dish                                                                             | Reverse scores | Reverse scores  |
| Miscellaneous animal-based foods       | Pizza, chowder or cream soup, mayonnaise or other creamy salad dressing                                                                                                                                                                                                | Reverse scores | Reverse scores  |

Abbreviations: hPDI, healthful plant-based diet index, uPDI, unhealthful plant-based diet index; NHS, Nurses' Health Study.

**Supplementary Table 2. Hazard Ratios (95% CIs) for frailty according to quintiles of Plant-based diets among women who 1) had no frailty criteria at baseline and 2) had no cancer, cardiovascular disease or diabetes at baseline.**

|                                                                 | Quintile 1  | Quintile 2        | Quintile 3        | Quintile 4        | Quintile 5        | <i>P</i> Value for Trend |
|-----------------------------------------------------------------|-------------|-------------------|-------------------|-------------------|-------------------|--------------------------|
| <b>No frailty criteria at baseline</b>                          |             |                   |                   |                   |                   |                          |
| <b>Healthful Plant-Based Diet Index</b>                         |             |                   |                   |                   |                   |                          |
| Cases/persons-years                                             | 2779/234952 | 2672/229290       | 2687/236452       | 2584/239952       | 2188/235756       |                          |
| Multivariable-adjusted model                                    | Ref. 1.0    | 0.94 (0.90, 1.00) | 0.88 (0.83, 0.93) | 0.81 (0.77, 0.86) | 0.70 (0.66, 0.74) | <0.001                   |
| <b>Unhealthful Plant-Based Diet Index</b>                       |             |                   |                   |                   |                   |                          |
| Cases/persons-years                                             | 2166/239041 | 2352/230904       | 2628/238420       | 2667/231686       | 2097/236350       |                          |
| Multivariable-adjusted model                                    | Ref. 1.0    | 1.09 (1.03, 1.16) | 1.20 (1.13, 1.27) | 1.21 (1.14, 1.28) | 1.39 (1.30, 1.47) | <0.001                   |
| <b>Excluding those with cancer, CVD or diabetes at baseline</b> |             |                   |                   |                   |                   |                          |
| <b>Healthful Plant-Based Diet Index</b>                         |             |                   |                   |                   |                   |                          |
| Cases/persons-years                                             | 2277/206908 | 2241/207412       | 2189/209667       | 2126/212293       | 1781/208750       |                          |
| Multivariable-adjusted model                                    | Ref. 1.0    | 0.93 (0.87, 0.98) | 0.87 (0.82, 0.92) | 0.81 (0.76, 0.86) | 0.68 (0.64, 0.73) | <0.001                   |
| <b>Unhealthful Plant-Based Diet Index</b>                       |             |                   |                   |                   |                   |                          |
| Cases/persons-years                                             | 1758/212275 | 1913/204463       | 2164/212723       | 2187/204283       | 2592/211285       |                          |
| Multivariable-adjusted model                                    | Ref. 1.0    | 1.08 (1.01, 1.15) | 1.18 (1.11, 1.26) | 1.22 (1.14, 1.30) | 1.39 (1.30, 1.48) | <0.001                   |

The multivariable-adjusted model was adjusted for age (months), calendar time (4-y intervals), body mass index (<25.0, 25.0-29.9, ≥30.0 kg/m<sup>2</sup>) at baseline, socioeconomic status, smoking status (never, past, and current 1-14, 15-24, and ≥25 cigarettes/day), alcohol intake (0, 1.0-4.9, 5.0-14.9, or ≥15.0 g/d), energy intake (quintiles of kcal/d), margarine intake, and medication use (aspirin, postmenopausal hormone

therapy, diuretics,  $\beta$ -blockers, calcium channel blockers, ACE inhibitors, other blood pressure medication, statins and other cholesterol lowering drugs, insulin, oral hypoglycemic medication).

**Supplementary Table 3. Hazard Ratios (95% CIs) for frailty according to quintiles of modified versions of Plant-Based Diet Indices among women aged  $\geq 60$  y in the Nurses' Health Study\***

|                                                                    | Quintile 1  | Quintile 2        | Quintile 3        | Quintile 4        | Quintile 5        | <i>P</i> Value for Trend |
|--------------------------------------------------------------------|-------------|-------------------|-------------------|-------------------|-------------------|--------------------------|
| <b>Healthful Plant-Based Diet Index without fruit juices</b>       |             |                   |                   |                   |                   |                          |
| Cases/persons-years                                                | 2776/235739 | 2690/232980       | 2703/235086       | 2569/237002       | 2172/235595       |                          |
| Multivariable-adjusted model                                       | Ref. 1.0    | 0.92 (0.87, 0.97) | 0.88 (0.83, 0.93) | 0.80 (0.75, 0.84) | 0.68 (0.64, 0.72) | <0.001                   |
| <b>Healthful Plant-Based Diet Index without orange juices</b>      |             |                   |                   |                   |                   |                          |
| Cases/persons-years                                                | 2717/235470 | 2672/231823       | 2718/239519       | 2584/233340       | 2219/236249       |                          |
| Multivariable-adjusted model                                       | Ref. 1.0    | 0.93 (0.88, 0.98) | 0.88 (0.84, 0.93) | 0.82 (0.78, 0.87) | 0.70 (0.65, 0.74) | <0.001                   |
| <b>Unhealthful Plant-Based Diet Index without fruit juices</b>     |             |                   |                   |                   |                   |                          |
| Cases/persons-years                                                | 2164/236143 | 2424/235312       | 2564/238351       | 2724/231209       | 3034/235386       |                          |
| Multivariable-adjusted model                                       | Ref. 1.0    | 1.12 (1.06, 1.19) | 1.22 (1.14, 1.29) | 1.29 (1.22, 1.37) | 1.45 (1.36, 1.55) | <0.001                   |
| <b>Unhealthful Plant-Based Diet Index without orange juices</b>    |             |                   |                   |                   |                   |                          |
| Cases/persons-years                                                | 2153/234649 | 2449/236409       | 2579/237630       | 2731/233834       | 2998/233879       |                          |
| Multivariable-adjusted model                                       | Ref. 1.0    | 1.11 (1.05, 1.18) | 1.19 (1.12, 1.26) | 1.24 (1.17, 1.32) | 1.38 (1.30, 1.47) | <0.001                   |
| <b>Healthful Plant-Based Diet Index with fish (positive score)</b> |             |                   |                   |                   |                   |                          |
| Cases/persons-years                                                | 2827/235582 | 2862/235260       | 2654/233856       | 2492/234953       | 2075/236749       |                          |

|                              |      |                   |                   |                   |                   |        |
|------------------------------|------|-------------------|-------------------|-------------------|-------------------|--------|
| Multivariable-adjusted model | Ref. | 0.95 (0.90, 1.00) | 0.88 (0.83, 0.93) | 0.79 (0.75, 0.83) | 0.68 (0.64, 0.72) | <0.001 |
|------------------------------|------|-------------------|-------------------|-------------------|-------------------|--------|

---

**Healthful Plant-Based Diet Index with yogurt (positive score)**

---

|                              |             |                   |                   |                   |                   |        |
|------------------------------|-------------|-------------------|-------------------|-------------------|-------------------|--------|
| Cases/persons-years          | 2797/233344 | 2800/234784       | 2676/23668        | 2503/235115       | 2134/236490       |        |
| Multivariable-adjusted model | Ref.        | 0.95 (0.90, 1.00) | 0.88 (0.83, 0.93) | 0.80 (0.76, 0.85) | 0.70 (0.66, 0.74) | <0.001 |

---

The multivariable-adjusted model was adjusted for age (months), calendar time (4-y intervals), body mass index (<25.0, 25.0-29.9, ≥30.0 kg/m<sup>2</sup>) at baseline, socioeconomic status, smoking status (never, past, and current 1-14, 15-24, and ≥25 cigarettes/day), alcohol intake (0, 1.0-4.9, 5.0-14.9, or ≥15.0 g/d), energy intake (quintiles of kcal/d), margarine intake, and medication use (aspirin, postmenopausal hormone therapy, diuretics, β-blockers, calcium channel blockers, ACE inhibitors, other blood pressure medication, statins and other cholesterol lowering drugs, insulin, oral hypoglycemic medication).

**Supplementary Table 4. Hazard Ratios (95% CIs) for frailty according to quintiles of food categories among women aged  $\geq 60$  y in the Nurses' Health Study**

|                                       | Quintile 1   | Quintile 2        | Quintile 3        | Quintile 4        | Quintile 5        | <i>P</i> Value for Trend |
|---------------------------------------|--------------|-------------------|-------------------|-------------------|-------------------|--------------------------|
| <b>Healthful plant-food intake</b>    |              |                   |                   |                   |                   |                          |
| Cases/persons-years                   | 3088/233758  | 2774/234816       | 2561/235446       | 2353/235978       | 2134/236376       |                          |
| Multivariable-adjusted model          | Ref. 1.0     | 0.87 (0.83, 0.92) | 0.78 (0.73, 0.82) | 0.71 (0.67, 0.75) | 0.64 (0.60, 0.68) | <0.001                   |
| <b>Less healthy plant food intake</b> |              |                   |                   |                   |                   |                          |
| Median (range)                        | 2.1 (0, 2.7) | 3.1 (2.4, 3.6)    | 3.9 (3.3, 4.5)    | 4.9 (4.2, 5.7)    | 6.7 (5.3, 21.4)   |                          |
| Cases/persons-years                   | 2617/235235  | 2425/235496       | 2525/235496       | 2627/235298       | 2716/234599       |                          |
| Multivariable-adjusted model          | Ref. 1.0     | 0.93 (0.88, 0.99) | 0.99 (0.93, 1.05) | 1.07 (1.00, 1.14) | 1.12 (1.04, 1.20) | <0.001                   |
| <b>Animal food intake</b>             |              |                   |                   |                   |                   |                          |
| Median (range)                        | 2.8 (0, 3.4) | 3.8 (3.4, 4.3)    | 4.6 (4.2, 5.1)    | 5.4 (4.9, 6.2)    | 6.8 (5.9, 20.2)   |                          |
| Cases/persons-years                   | 2490/235500  | 2544/235519       | 2605/235263       | 2603/235544       | 2668/234576       |                          |
| Multivariable-adjusted model          | Ref. 1.0     | 1.08 (1.02, 1.14) | 1.13 (1.06, 1.21) | 1.19 (1.11, 1.27) | 1.27 (1.17, 1.37) | <0.001                   |

The multivariable-adjusted model was adjusted for age (months), calendar time (4-y intervals), body mass index (<25.0, 25.0-29.9,  $\geq 30.0$  kg/m<sup>2</sup>) at baseline, socioeconomic status, smoking status (never, past, and current 1-14, 15-24, and  $\geq 25$  cigarettes/day), alcohol intake (0, 1.0-4.9, 5.0-14.9, or  $\geq 15.0$  g/d), energy intake (quintiles of kcal/d), margarine intake, and medication use (aspirin, postmenopausal hormone therapy, diuretics,  $\beta$ -blockers, calcium channel blockers, ACE inhibitors, other blood pressure medication, statins and other cholesterol lowering drugs, insulin, oral hypoglycemic medication).

**Supplementary Table 5. Hazard Ratios (95% CIs) for frailty according to quintiles of Plant-Based Diet Indices with different latency periods using data among women aged  $\geq 60$  y in the Nurses' Health Study\***

|                                           | <b>0-4 y latency</b> | <b>4-8 y latency</b> | <b>8-12 y latency</b> | <b>12-16 y latency</b> |
|-------------------------------------------|----------------------|----------------------|-----------------------|------------------------|
| <b>Healthful plant-based diet index</b>   |                      |                      |                       |                        |
| Quintile 1                                | Ref 1.0              | Ref 1.0              | Ref 1.0               | Ref 1.0                |
| Quintile 2                                | 0.84 (0.79, 0.89)    | 0.94 (0.89, 0.99)    | 0.93 (0.88, 0.98)     | 0.98 (0.92, 1.05)      |
| Quintile 3                                | 0.81 (0.77, 0.86)    | 0.88 (0.83, 0.93)    | 0.88 (0.83, 0.93)     | 0.91 (0.86, 0.97)      |
| Quintile 4                                | 0.74 (0.70, 0.78)    | 0.80 (0.76, 0.85)    | 0.81 (0.77, 0.86)     | 0.86 (0.80, 0.91)      |
| Quintile 5                                | 0.62 (0.59, 0.66)    | 0.70 (0.66, 0.74)    | 0.74 (0.70, 0.79)     | 0.75 (0.70, 0.81)      |
| p trend                                   | <0.001               | <0.001               | <0.001                | <0.001                 |
| <b>Unhealthful plant-based diet index</b> |                      |                      |                       |                        |
| Quintile 1                                | Ref 1.0              | Ref 1.0              | Ref 1.0               | Ref 1.0                |
| Quintile 2                                | 1.10 (1.03, 1.18)    | 1.10 (1.03, 1.16)    | 1.07 (1.00, 1.13)     | 1.02 (0.95, 1.09)      |
| Quintile 3                                | 1.20 (1.12, 1.27)    | 1.19 (1.13, 1.26)    | 1.09 (1.03, 1.16)     | 1.08 (1.01, 1.15)      |
| Quintile 4                                | 1.31 (1.23, 1.40)    | 1.19 (1.13, 1.27)    | 1.13 (1.06, 1.20)     | 1.18 (1.09, 1.26)      |
| Quintile 5                                | 1.55 (1.45, 1.65)    | 1.33 (1.25, 1.41)    | 1.23 (1.16, 1.31)     | 1.22 (1.14, 1.30)      |
| p trend                                   | <0.001               | <0.001               | <0.001                | <0.001                 |

\*The multivariable-adjusted model was adjusted for age (months), calendar time (4-y intervals), body mass index (<25.0, 25.0-29.9,  $\geq 30.0$  kg/m<sup>2</sup>) at baseline, socioeconomic status, smoking status (never, past, and current 1-14, 15-24, and  $\geq 25$  cigarettes/day), alcohol intake (0, 1.0-4.9, 5.0-14.9, or  $\geq 15.0$  g/d), energy intake (quintiles of kcal/d), margarine intake, and medication use (aspirin, postmenopausal hormone therapy, diuretics,  $\beta$ -blockers, calcium channel blockers, ACE inhibitors, other blood pressure medication, statins and other cholesterol lowering drugs, insulin, oral hypoglycemic medication).



**Supplementary Table 6. Hazard Ratios (95% CIs) for frailty according to quintiles of Plant-Based Diet Indices across subgroups of women aged  $\geq 60$  y in the Nurses' Health Study\***

|                                      | <b>Per 10-unit increase<br/>Healthful plant-based diet<br/>index</b> | <b>Per 10-unit increase<br/>Unhealthful plant-based diet<br/>index</b> |
|--------------------------------------|----------------------------------------------------------------------|------------------------------------------------------------------------|
| Age, years                           |                                                                      |                                                                        |
| <65                                  | 0.83 (0.75, 0.92)                                                    | 1.19 (1.08, 1.31)                                                      |
| $\geq 65$                            | 0.80 (0.77, 0.82)                                                    | 1.19 (1.16, 1.23)                                                      |
| Smoking status                       |                                                                      |                                                                        |
| Never                                | 0.83 (0.80, 0.85)                                                    | 1.18 (1.14, 1.22)                                                      |
| Ever                                 | 0.86 (0.76, 0.97)                                                    | 1.15 (1.02, 1.29)                                                      |
| Alcohol intake                       |                                                                      |                                                                        |
| Non-drinker                          | 0.79 (0.75, 0.83)                                                    | 1.23 (1.17, 1.29)                                                      |
| Drinker                              | 0.82 (0.79, 0.86)                                                    | 1.15 (1.11, 1.20)                                                      |
| Protein intake                       |                                                                      |                                                                        |
| <1.2 g/kg/day                        | 0.81 (0.74, 0.89)                                                    | 1.19 (1.09, 1.31)                                                      |
| $\geq 1.2$ g/kg/day                  | 0.81 (0.78, 0.83)                                                    | 1.19 (1.15, 1.22)                                                      |
| Physical Activity                    |                                                                      |                                                                        |
| $\leq 150$ min                       | 0.86 (0.82, 0.89)                                                    | 1.13 (1.09, 1.18)                                                      |
| >150 min                             | 0.81 (0.77, 0.84)                                                    | 1.17 (1.11, 1.23)                                                      |
| Body mass index (Kg/m <sup>2</sup> ) |                                                                      |                                                                        |
| <25                                  | 0.77 (0.73, 0.81)                                                    | 1.29 (1.22, 1.36)                                                      |
| $\geq 25$                            | 0.80 (0.77, 0.83)                                                    | 1.12 (1.08, 1.16)                                                      |
| Aspirin use                          |                                                                      |                                                                        |
| No                                   | 0.81 (0.79, 0.84)                                                    | 1.18 (1.14, 1.21)                                                      |
| Yes                                  | 0.65 (0.55, 0.77)                                                    | 1.36 (1.16, 1.58)                                                      |
| Hypertension                         |                                                                      |                                                                        |
| No                                   | 0.78 (0.75, 0.81)                                                    | 1.25 (1.20, 1.30)                                                      |
| Yes                                  | 0.85 (0.81, 0.89)                                                    | 1.11 (1.06, 1.16)                                                      |
| Hypercholesterolemia                 |                                                                      |                                                                        |

|          |                   |                   |
|----------|-------------------|-------------------|
| No       | 0.79 (0.75, 0.82) | 1.21 (1.16, 1.26) |
| Yes      | 0.83 (0.79, 0.87) | 1.15 (1.10, 1.20) |
| Diabetes |                   |                   |
| No       | 0.80 (0.77, 0.82) | 1.20 (1.16, 1.24) |
| Yes      | 0.88 (0.80, 0.96) | 1.11 (1.02, 1.21) |

---

\*The multivariable-adjusted model was adjusted for age (months), calendar time (4-y intervals), body mass index (<25.0, 25.0-29.9,  $\geq$ 30.0 kg/m<sup>2</sup>) at baseline, socioeconomic status, smoking status (never, past, and current 1-14, 15-24, and  $\geq$ 25 cigarettes/day), alcohol intake (0, 1.0-4.9, 5.0-14.9, or  $\geq$ 15.0 g/d), energy intake (quintiles of kcal/d), margarine intake, and medication use (aspirin, postmenopausal hormone therapy, diuretics,  $\beta$ -blockers, calcium channel blockers, ACE inhibitors, other blood pressure medication, statins and other cholesterol lowering drugs, insulin, oral hypoglycemic medication).

**eFigure 1** Participant flow chart

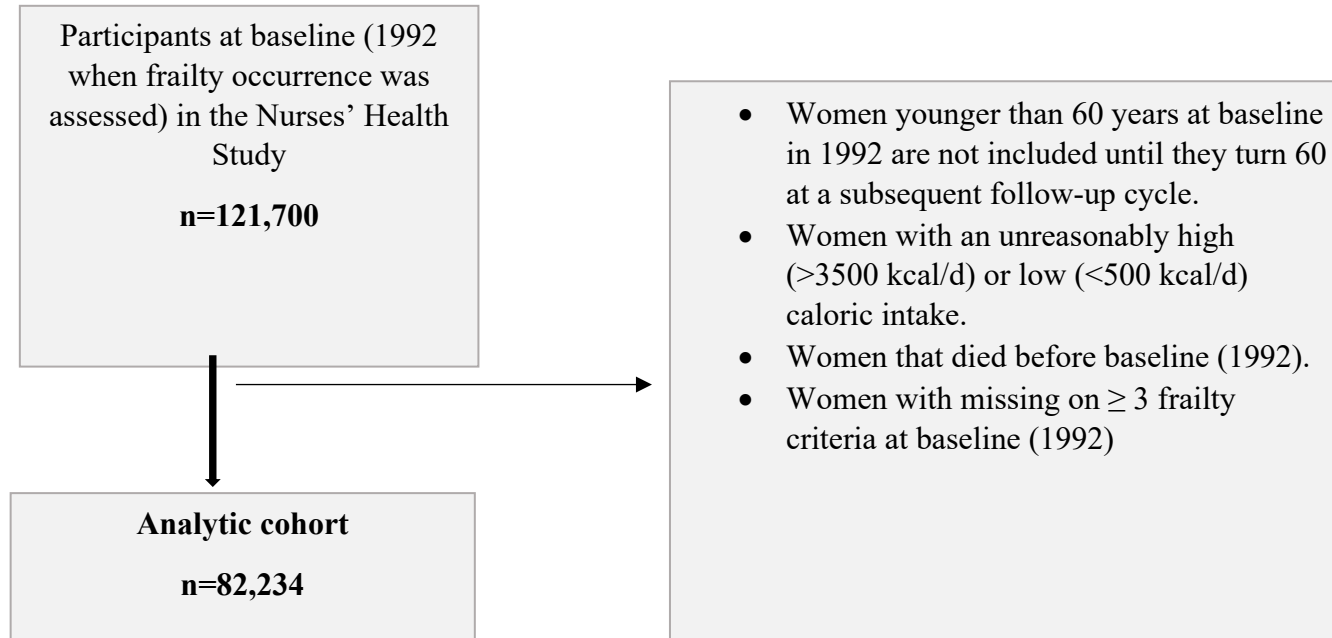

Supplement: JCSM-13-2854-s001.pdf [file JCSM-13-2854-s001.pdf]
